# Supplementary material for: Euhedral crystals of Na2TiGeO5with switchable translucency and reorientable microstructure
Source: Royal Society of Chemistry journal article supplement (doi:10.1039/c9ce00780f), 2019-01-01
Supplement: c9ce00780f1.pdf [file c9ce00780f1.pdf]

SUPPORTING INFORMATION

**Euhedral crystals of  $\text{Na}_2\text{TiGeO}_5$  with switchable translucency and reorientable  
microstructure**

Stanislav Ferdov

Department of Physics, University of Minho, 4800-058 Guimarães, Portugal

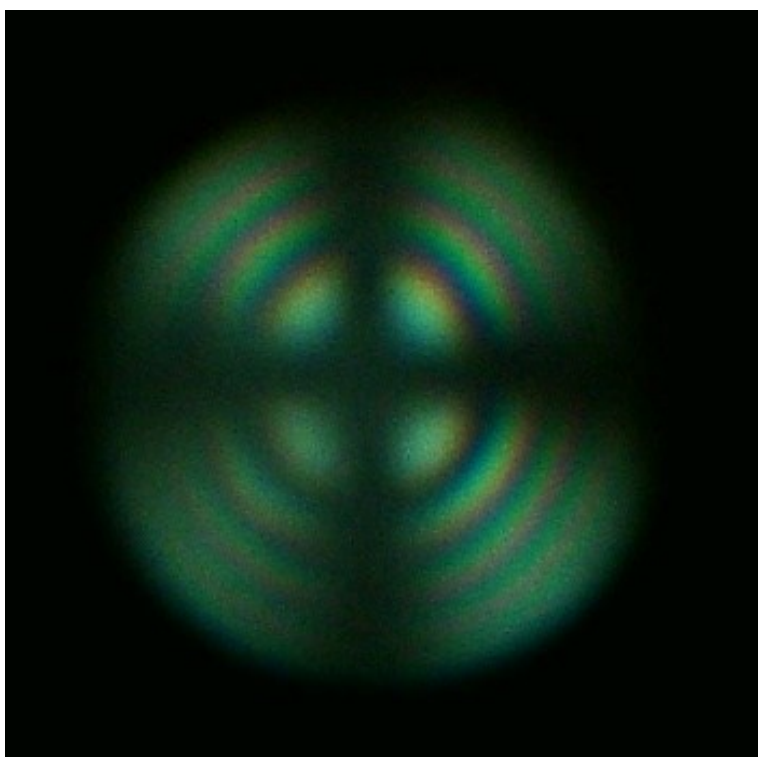

**Figure S1.** Conoscopic interference figure of  $\text{Na}_2\text{TiGeO}_5$  obtained along the basal pinacoid.
